# Supplementary material for: Prognostic Discrimination Using a 70-Gene Signature among Patients with Estrogen Receptor-Positive Breast Cancer and an Intermediate 21-Gene Recurrence Score
Source: MDPI journal article supplement (doi:10.3390/ijms141223685), 2013-12-04
Supplement: s2 [file s2]

## Sheet: ER+brc294.btwn
Table S2. 487 gene features that were differentially expressed between the two clusters based on an average linkage clustering method.
PROBE_ID	NAME	Mm1	Mm2	Diff	ttest
ILMN_2193980	ABCB6	9.19625	8.82281	0.373437	0.00182584
ILMN_1707925	ABHD12B	8.0075	7.53703	0.470469	0.00590038
ILMN_1716480	ACD	9.01688	8.60187	0.415	0.000174519
ILMN_1740265	ACOT7	10.6369	10.1059	0.530937	0.00405645
ILMN_1685703	ACOX2	10.9238	9.64563	1.27812	0.000715816
ILMN_1795325	ACTG2	9.58125	10.6672	-1.08594	0.00818106
ILMN_2232177	ACTN1	12.31	12.8867	-0.576719	0.00486372
ILMN_1747227	ADORA1	9.62812	8.81969	0.808437	0.00330522
ILMN_1659371	ADRA2A	7.6175	7.99766	-0.380156	0.00614953
ILMN_1760143	ADRM1	10.6956	10.2811	0.414531	0.00785398
ILMN_1718071	AGTPBP1	9.14938	8.73469	0.414687	1.52756e-05
ILMN_1809139	AHCTF1	10.1969	9.73641	0.460469	0.000404772
ILMN_1797974	AIG1	9.34125	8.93984	0.401406	0.00539692
ILMN_2387712	AK5	7.4275	7.96344	-0.535938	0.00609635
ILMN_1752247	AKAP13	8.24875	8.655	-0.40625	0.00440919
ILMN_1807439	ALDH1A3	7.89375	8.44562	-0.551875	0.00359435
ILMN_1722102	ANAPC11	10.5594	10.1673	0.392031	0.00490457
ILMN_1756417	ANKRD37	8.51375	8.91609	-0.402344	0.00707807
ILMN_1724040	ANKRD57	10.1512	10.7094	-0.558125	0.00250512
ILMN_1739645	ANLN	8.10062	7.74234	0.358281	0.000921452
ILMN_1796737	APM-1	8.1925	8.85906	-0.666563	0.000827143
ILMN_1789007	APOC1	11.2319	10.5123	0.719531	0.00806661
ILMN_2149766	APPBP2	10.6769	10.0986	0.578281	0.000189268
ILMN_1681103	AQP1	7.3725	7.72609	-0.353594	0.00707197
ILMN_1764571	ARHGAP23	9.03313	9.63313	-0.6	2.58236e-05
ILMN_1777998	ARHGAP25	8.77875	8.36859	0.410156	0.00469442
ILMN_2132809	ARHGEF10	9.875	10.3264	-0.451406	0.00333346
ILMN_1775405	ARL4A	7.67813	8.28219	-0.604062	0.00255899
ILMN_1788192	ARMCX1	8.46438	9.305	-0.840625	0.000392115
ILMN_2325168	ARRB1	9.15875	8.78531	0.373438	0.00141023
ILMN_1701653	ASCL1	8.45375	7.70984	0.743906	0.00860261
ILMN_1695414	ASF1B	8.84563	8.22	0.625625	0.00087649
ILMN_1815184	ASPM	9.61	8.55109	1.05891	5.91711e-08
ILMN_1669113	ATF5	10.3525	9.84813	0.504375	0.000366408
ILMN_1673991	ATIC	12.3075	11.9398	0.367656	0.00446545
ILMN_1670609	ATOX1	11.8594	11.4534	0.405938	0.00712286
ILMN_2407824	ATP1B1	10.8869	11.6727	-0.785781	0.00436389
ILMN_1815666	ATP2A2	11.1937	10.7531	0.440625	0.00492327
ILMN_1721391	ATP6V0B	12.7338	12.3703	0.363438	0.00979406
ILMN_1810235	ATP6V1E2	7.85	8.22688	-0.376875	0.00107738
ILMN_2089073	ATP9A	12.6831	12.2367	0.446406	0.00682313
ILMN_1680955	AURKA	10.1288	9.12063	1.00812	2.64208e-07
ILMN_1684217	AURKB	9.17812	8.43406	0.744063	3.24079e-06
ILMN_2074258	BARD1	10.3588	9.89031	0.468438	0.00608993
ILMN_1812403	BCAP31	12.5738	12.1905	0.383281	0.00288568
ILMN_1808059	BCAS4	11.1738	10.4755	0.698281	0.00620335
ILMN_1803124	BIRC5	7.94312	7.47609	0.467031	2.9329e-07
ILMN_1709484	BLM	8.24	7.76047	0.479531	1.33532e-06
ILMN_1718961	BNIP3L	9.525	10.0063	-0.48125	0.00831086
ILMN_2349600	BRD8	9.81188	9.43219	0.379688	0.00301046
ILMN_2202948	BUB1	8.54188	7.8625	0.679375	8.61368e-07
ILMN_1693145	BUB3	13.0844	12.642	0.442344	0.000349248
ILMN_1790100	C11orf82	8.4825	7.87703	0.605469	2.05387e-07
ILMN_1727055	C12orf48	8.44937	7.93141	0.517969	9.12874e-06
ILMN_1713744	C14orf132	8.97813	9.53734	-0.559219	0.00982055
ILMN_1657111	C14orf78	9.2625	10.2139	-0.951406	0.000661494
ILMN_1674662	C15orf42	7.86	7.43078	0.429219	1.40126e-05
ILMN_1801118	C16orf33	11.4294	10.9381	0.49125	0.00286734
ILMN_1656452	C16orf59	8.66938	8.11516	0.554219	1.75262e-05
ILMN_1783333	C16orf61	11.7156	11.0117	0.703906	8.72997e-08
ILMN_1790537	C16orf75	9.15563	8.53469	0.620937	7.25136e-07
ILMN_1776490	C17orf53	8.95812	8.50391	0.454219	0.00289526
ILMN_2398926	C17orf58	11.8706	11.3433	0.527344	0.00948306
ILMN_1771224	C18orf24	8.02875	7.66875	0.36	1.24044e-05
ILMN_1796074	C18orf56	9.09	8.43078	0.659219	0.000577885
ILMN_1759184	C19orf48	10.6494	10.1713	0.478125	0.00179781
ILMN_1727540	C1orf112	9.17	8.70203	0.467969	8.58418e-05
ILMN_1787280	C1orf135	8.29	7.90922	0.380781	0.00026267
ILMN_1729509	C1orf43	10.9069	10.4745	0.432344	0.00348833
ILMN_2380237	C1QTNF1	9.23937	9.89922	-0.659844	0.00253108
ILMN_1729288	C1QTNF6	9.13	9.68547	-0.555469	0.00793538
ILMN_1733288	C1RL	8.16875	8.67422	-0.505469	0.00118583
ILMN_1790136	C20orf20	11.1456	10.723	0.422656	0.00538534
ILMN_2206474	C20orf39	7.81188	8.47047	-0.658594	0.00420691
ILMN_1751228	C20orf46	9.07187	8.49563	0.57625	0.00464925
ILMN_1813344	C20orf7	9.66938	9.31937	0.35	0.0020102
ILMN_1772869	C20orf82	7.87625	8.37063	-0.494375	0.00585085
ILMN_1795836	C21orf57	9.3475	9.71438	-0.366875	0.00775384
ILMN_1689176	C4orf31	7.37937	7.76109	-0.381719	0.00788708
ILMN_1763907	C6orf173	8.745	8.23047	0.514531	3.94801e-05
ILMN_1696699	C6orf60	8.53375	8.05969	0.474063	0.000712316
ILMN_1656369	C8orf4	8.74	10.0364	-1.29641	0.000273925
ILMN_1702197	C9orf140	9.035	8.55469	0.480313	0.00390683
ILMN_1779043	CACNG6	8.08438	7.36516	0.719219	0.0021662
ILMN_1748840	CALB2	8.16062	8.90844	-0.747813	0.00122494
ILMN_2324002	CALD1	9.00813	9.7425	-0.734375	0.00245331
ILMN_1688580	CAMP	8.55813	7.83188	0.72625	0.00707989
ILMN_1809477	CARHSP1	11.2906	10.8491	0.441563	0.00456893
ILMN_1687583	CAV1	7.79688	8.21969	-0.422812	0.00371876
ILMN_1658835	CAV2	8.29063	8.84844	-0.557812	0.00161825
ILMN_1770678	CBX2	9.24875	8.5675	0.68125	0.00624533
ILMN_1796762	CCDC102A	8.61	9.05203	-0.442031	0.00225583
ILMN_1789266	CCDC25	9.795	10.2083	-0.413281	0.00558654
ILMN_1685112	CCDC44	10.3806	9.97937	0.40125	0.00373694
ILMN_1686135	CCDC45	10.1712	9.68813	0.483125	0.000523871
ILMN_1786125	CCNA2	8.70875	8.07187	0.636875	8.9906e-09
ILMN_1712803	CCNB1	8.3075	7.68609	0.621406	8.31479e-07
ILMN_1801939	CCNB2	9.74	8.83281	0.907188	1.03436e-07
ILMN_2374425	CCNE1	8.46375	8.035	0.42875	0.00338553
ILMN_2412384	CCNE2	8.99	8.42141	0.568594	0.000660572
ILMN_1773119	CCNF	10.2913	9.60297	0.688281	0.000164553
ILMN_1724789	CD59	8.57563	9.23547	-0.659844	0.000271092
ILMN_1792538	CD7	8.56187	8.11719	0.444688	0.00735741
ILMN_2392274	CD82	7.975	8.56453	-0.589531	0.00153145
ILMN_1687074	CDC14B	7.1775	7.54734	-0.369844	8.68776e-06
ILMN_1747911	CDC2	8.68687	8.20219	0.484687	0.00346409
ILMN_1663390	CDC20	10.7919	9.76203	1.02984	1.62393e-06
ILMN_1711005	CDC25A	8.22875	7.72812	0.500625	2.61633e-05
ILMN_2338323	CDC25B	10.9838	10.0242	0.959531	1.52278e-06
ILMN_1725260	CDC25C	8.21063	7.64094	0.569688	1.95671e-07
ILMN_1670238	CDC45L	9.59875	8.54906	1.04969	4.21655e-09
ILMN_1741801	CDC7	8.23	7.73187	0.498125	1.3097e-05
ILMN_1737728	CDCA3	8.3025	7.73516	0.567344	3.47782e-06
ILMN_1683450	CDCA5	10.3331	9.1675	1.16562	2.01054e-10
ILMN_1737184	CDCA7	8.69688	8.16719	0.529688	0.000584546
ILMN_1709294	CDCA8	9.24375	8.50891	0.734844	1.71557e-06
ILMN_1748883	CDKN2D	8.97875	8.41047	0.568281	9.01838e-06
ILMN_1666305	CDKN3	8.44063	7.89	0.550625	1.91997e-05
ILMN_1651237	CDT1	8.75437	8.09203	0.662344	3.14739e-07
ILMN_1801257	CENPA	8.43062	7.81703	0.613594	8.14784e-07
ILMN_2225718	CENPE	7.84063	7.41609	0.424531	1.05162e-07
ILMN_1664516	CENPF	10.2313	9.32703	0.904219	5.06815e-05
ILMN_1737195	CENPK	8.07625	7.69406	0.382187	4.89546e-05
ILMN_2368718	CENPM	9.47188	8.62844	0.843438	1.63188e-06
ILMN_1720526	CENPN	8.96	8.25766	0.702344	5.7615e-08
ILMN_1747016	CEP55	9.255	8.53641	0.718594	3.73226e-07
ILMN_2387090	CGGBP1	10.0106	9.64703	0.363594	0.000724625
ILMN_1674231	CHAF1B	8.58875	8.23531	0.353438	0.00207266
ILMN_1664630	CHEK1	8.375	7.98438	0.390625	6.66799e-06
ILMN_1756705	CHTF18	9.85062	9.08062	0.77	0.000180287
ILMN_1796235	CIRH1A	10.3675	9.93328	0.434219	6.51042e-05
ILMN_1751776	CKAP2L	9.00188	8.34406	0.657812	6.67833e-05
ILMN_1732066	CKMT1A	8.66188	8.06266	0.599219	0.00644554
ILMN_2072296	CKS2	10.7669	9.84203	0.924844	2.43014e-06
ILMN_1671933	CLCC1	9.27437	8.87172	0.402656	0.00086547
ILMN_1724686	CLDN1	8.15437	9.22094	-1.06656	1.08177e-06
ILMN_1807359	CLEC11A	9.06625	9.64469	-0.578437	0.00626576
ILMN_1699665	CLIC6	9.24125	11.3872	-2.14594	0.000173323
ILMN_2394381	CLN3	10.4119	9.95125	0.460625	0.00661947
ILMN_1756779	CLTC	8.28375	7.86469	0.419062	0.00257216
ILMN_2370208	CMTM3	8.67437	9.18313	-0.50875	0.0076324
ILMN_1698934	CMTM7	10.735	11.3973	-0.662344	0.00306564
ILMN_1698733	CNIH2	8.56188	8.17141	0.390469	0.00927004
ILMN_1810054	CNN1	7.9675	8.78062	-0.813125	0.000259392
ILMN_1708486	CNN2	7.11875	7.47375	-0.355	0.00251349
ILMN_1770290	CNN2	10.4294	11.0612	-0.631875	0.00828229
ILMN_1807525	CNTD2	8.45625	7.88187	0.574375	0.0010972
ILMN_1684554	COL16A1	9.4875	10.2252	-0.737656	0.00654906
ILMN_1785272	COL1A2	12.28	13.255	-0.975	0.00769651
ILMN_1674785	COL2A1	8.7875	7.81641	0.971094	0.00664369
ILMN_1809928	COL6A2	9.12312	10.0092	-0.886094	0.00384622
ILMN_1756572	COQ2	10.0744	9.65031	0.424062	0.000223741
ILMN_2187718	COX17	12.7363	12.2144	0.521875	0.00365589
ILMN_1652207	COX4I1	14.12	13.7666	0.353438	0.00472212
ILMN_1704477	COX5A	12.1475	11.763	0.384531	0.00390854
ILMN_1654151	COX6C	14.1819	13.638	0.543906	0.0053015
ILMN_1694432	CRIP2	11.2663	11.8491	-0.582812	0.00423264
ILMN_1686805	CRK	8.88063	9.48062	-0.6	0.00364519
ILMN_1665235	CRTAP	7.8575	8.58188	-0.724375	0.00875522
ILMN_1729216	CRYAB	8.60375	9.23578	-0.632031	0.00805739
ILMN_1762115	CRYZL1	8.625	8.99438	-0.369375	0.00549872
ILMN_1706238	CSE1L	11.6069	11.1333	0.473594	4.17941e-05
ILMN_1783285	CTPS	9.385	8.96281	0.422188	9.82065e-05
ILMN_2088437	CX3CR1	8.1875	8.98344	-0.795937	0.000965154
ILMN_1796925	CXADR	8.50438	9.45125	-0.946875	8.79862e-05
ILMN_1689111	CXCL12	7.96188	8.65766	-0.695781	0.00555393
ILMN_1728478	CXCL16	10.9594	11.5111	-0.551719	0.0003021
ILMN_1745256	CXXC5	12.6256	12.0939	0.531719	0.00943003
ILMN_2378376	CYB561	10.7381	10.1131	0.625	0.000683971
ILMN_1684321	CYB5B	11.6287	11.2767	0.352031	0.00143496
ILMN_1670925	CYB5D1	9.41313	9.89453	-0.481406	0.00172962
ILMN_1739576	CYB5R2	8.04812	8.61172	-0.563594	0.000359897
ILMN_1712305	CYBRD1	10.2044	11.5534	-1.34906	4.03998e-07
ILMN_2175317	CYP4X1	9.4825	10.7891	-1.30656	0.00955771
ILMN_2374352	DBNDD1	9.67313	9.13391	0.539219	0.00606558
ILMN_2049303	DCI	10.3419	9.6925	0.649375	7.53419e-06
ILMN_1768227	DCN	7.88875	9.21094	-1.32219	0.0086642
ILMN_1747303	DDX39	11.7263	11.1588	0.5675	3.50843e-05
ILMN_1760954	DENR	11.8012	11.4359	0.365313	0.00230935
ILMN_1802819	DEPDC1	7.86312	7.51125	0.351875	2.29519e-05
ILMN_2326997	DHPS	11.015	10.5848	0.430156	0.000546755
ILMN_2384857	DHRS2	9.13562	7.88906	1.24656	0.000749311
ILMN_2325008	DHX40	8.7825	8.26859	0.513906	0.000553883
ILMN_2248589	DHX40	11.0387	10.5461	0.492656	0.00605212
ILMN_1763605	DIDO1	8.9	8.45516	0.444844	0.000302118
ILMN_1736704	DIXDC1	7.61813	8.05328	-0.435156	0.00830732
ILMN_1743373	DLL1	8.57437	9.09781	-0.523438	0.000807138
ILMN_1799516	DNAJC9	10.915	10.5503	0.364688	0.000112741
ILMN_1760201	DNMT1	12.0594	11.6262	0.433125	6.91322e-05
ILMN_2381257	DSC2	7.40562	7.79	-0.384375	0.000441778
ILMN_1704196	DSG2	7.90188	8.44469	-0.542812	0.00160988
ILMN_1779711	DTL	8.21625	7.66578	0.550469	2.92542e-05
ILMN_1730201	DTNA	8.97625	8.48437	0.491875	0.00608515
ILMN_1656501	DUSP5	11.1875	10.4489	0.738594	0.000183179
ILMN_1732688	DUT	9.11	8.685	0.425	0.00305744
ILMN_2374778	DUT	9.14062	8.75969	0.380937	0.00524055
ILMN_1773847	DYNC1I2	10.5356	10.9117	-0.376094	0.00867276
ILMN_1777233	E2F2	10.0881	9.11266	0.975469	1.89175e-06
ILMN_1798210	E2F7	8.26812	7.73281	0.535313	6.13307e-05
ILMN_1720287	E4F1	11.4694	11.0302	0.439219	0.00278847
ILMN_2072178	ECHDC3	8.84187	9.30547	-0.463594	0.00495533
ILMN_1746763	ECM2	7.36062	7.87484	-0.514219	0.00144689
ILMN_1717173	ECT2	9.625	9.03891	0.586094	0.000942437
ILMN_2350634	EFEMP1	8.77563	9.70188	-0.92625	0.00294949
ILMN_1653203	EFEMP2	9.94313	10.5131	-0.57	0.00945611
ILMN_2385672	ELN	7.54125	8.13563	-0.594375	0.00765085
ILMN_2111187	ELOVL6	9.61437	9.04656	0.567813	0.00138477
ILMN_2087941	ENTPD3	7.23563	7.59312	-0.3575	0.00159283
ILMN_1704753	EPAS1	9.99437	10.5875	-0.593125	0.0041245
ILMN_2214910	EPHB4	9.2475	9.75406	-0.506562	0.000261669
ILMN_1720285	ESD	10.2131	10.7298	-0.516719	0.00573057
ILMN_1742145	ESPL1	8.47938	8.00375	0.475625	1.4289e-06
ILMN_1678535	ESR1	12.0712	11.2059	0.865312	0.0053513
ILMN_1720941	EVC	8.39438	8.82437	-0.43	0.00588991
ILMN_1673721	EXO1	8.69875	7.95813	0.740625	6.51678e-11
ILMN_1721713	EXOSC9	9.19625	8.83484	0.361406	9.04689e-05
ILMN_1807554	EYA1	7.725	7.29141	0.433594	0.00989615
ILMN_1708105	EZH2	8.27313	7.83688	0.43625	0.000103761
ILMN_1717163	F13A1	7.42875	8.01156	-0.582812	0.00968669
ILMN_1797009	F3	7.5475	8.06797	-0.520469	0.00282222
ILMN_1788416	FAM108C1	11.66	11.1361	0.523906	0.00731079
ILMN_1713178	FAM116A	9.64438	9.25766	0.386719	0.0087007
ILMN_1723846	FAM119B	9.20938	9.67937	-0.47	0.00294685
ILMN_1712684	FAM20C	9.175	9.81797	-0.642969	0.000222069
ILMN_1807807	FAM33A	8.655	8.26219	0.392812	2.22058e-05
ILMN_1728972	FAM64A	8.26187	7.87781	0.384062	0.000909967
ILMN_2235137	FANCD2	8.66188	8.22109	0.440781	0.00112269
ILMN_2043452	FANCE	8.65625	8.29594	0.360313	0.000548244
ILMN_1655642	FANCI	8.00938	7.57047	0.438906	0.000412457
ILMN_1783182	FBN1	7.77688	8.13172	-0.354844	0.00942441
ILMN_1799389	FBXL6	9.21125	8.77703	0.434219	0.0029139
ILMN_1703955	FBXO32	10.4756	11.1613	-0.685625	0.00259107
ILMN_2302757	FCGBP	9.28	11.0952	-1.81516	2.46421e-06
ILMN_1782015	FCRLB	9.165	8.30297	0.862031	0.00514394
ILMN_2160929	FEN1	11.0031	10.0078	0.995313	3.18361e-10
ILMN_1810289	FER1L3	11.1444	11.7094	-0.565	6.22107e-05
ILMN_1779071	FEZ1	8.36	8.81938	-0.459375	0.00744825
ILMN_1797895	FFAR2	7.97687	7.51234	0.464531	0.0037793
ILMN_1723123	FGFR3	11.4944	10.3552	1.13922	0.0057675
ILMN_1703558	FHL3	8.935	9.29047	-0.355469	0.0033837
ILMN_1730906	FILIP1L	8.50438	9.02516	-0.520781	0.00631728
ILMN_1665243	FKBP14	8.16563	8.62375	-0.458125	0.00537888
ILMN_2089977	FKBP9L	10.26	10.6973	-0.437344	0.00402568
ILMN_1663667	FLAD1	10.8362	10.4016	0.434688	0.00647574
ILMN_1737170	FLII	9.1875	9.61703	-0.429531	0.00169897
ILMN_1737604	FLJ10986	9.12875	9.505	-0.37625	0.00918461
ILMN_1790315	FLJ21062	8.78188	9.22703	-0.445156	0.00918958
ILMN_1696243	FLJ23152	11.28	10.0945	1.18547	0.00150723
ILMN_1795300	FLJ41603	8.39125	8.8575	-0.46625	0.00772799
ILMN_1680388	FLJ45337	9.0025	8.5075	0.495	0.00668163
ILMN_1652333	FN3KRP	10.4463	10.0463	0.4	0.00355389
ILMN_1738401	FOXC1	9.90437	10.6864	-0.782031	0.00594133
ILMN_1704418	FOXD1	7.62813	7.21609	0.412031	0.0096726
ILMN_2344971	FOXM1	8.5525	7.85172	0.700781	1.73387e-07
ILMN_1669046	FOXQ1	7.59938	8.17781	-0.578437	0.00169514
ILMN_2203271	FPR3	9.30437	8.72406	0.580312	0.00679374
ILMN_1769282	FRMD6	9.67188	10.3961	-0.724219	0.00535412
ILMN_1730670	FSTL3	8.3675	8.9225	-0.555	0.00268644
ILMN_1776552	FUBP1	8.82062	8.43188	0.38875	0.00206781
ILMN_1794659	FUT2	7.49313	8.06141	-0.568281	0.00109032
ILMN_1703408	FZD3	7.9975	8.36453	-0.367031	0.00366916
ILMN_1761147	GABPB2	8.6675	8.30078	0.366719	0.0013502
ILMN_1772910	GAS1	9.24812	10.1544	-0.90625	0.00796943
ILMN_2211003	GAS2L3	8.60938	8.25359	0.355781	0.00259468
ILMN_1779558	GAS6	10.9531	11.7923	-0.839219	0.000159474
ILMN_2114568	GBP5	8.64188	8.03359	0.608281	0.00412129
ILMN_1809590	GINS2	10.5738	9.26391	1.30984	5.96816e-09
ILMN_2176037	GNA13	8.69125	8.21531	0.475938	0.00689428
ILMN_1761044	GNB1L	8.46813	8.1	0.368125	0.00899516
ILMN_1782419	GNG11	8.87438	9.44859	-0.574219	0.00682977
ILMN_1673380	GNG12	7.62312	8.29937	-0.67625	0.00434284
ILMN_1804357	GNG4	7.95812	7.28984	0.668281	4.89944e-05
ILMN_1728107	GNG7	8.04125	8.475	-0.43375	0.00144836
ILMN_1790692	GNLY	8.85438	8.24328	0.611094	0.00323492
ILMN_1656145	GOT1	10.6881	10.29	0.398125	0.000266416
ILMN_1801348	GOT2	12.2706	11.6109	0.659687	0.000558534
ILMN_1789502	GPC4	8.79437	9.48813	-0.69375	0.0015601
ILMN_1741224	GPR137C	8.30625	7.95547	0.350781	0.00333926
ILMN_2283325	GPR177	9.1325	10.2248	-1.09234	9.94892e-05
ILMN_2139816	GPSM2	8.88625	8.48453	0.401719	0.000329486
ILMN_1661443	GRAMD2	7.35	7.85031	-0.500312	0.00209461
ILMN_1669617	GRB10	8.38312	8.74141	-0.358281	0.00195509
ILMN_2227790	GRIN2C	7.6825	7.21687	0.465625	0.00629838
ILMN_1713162	GSTM2	8.08687	8.46141	-0.374531	0.00536758
ILMN_1736184	GSTM3	9.01313	9.79344	-0.780312	0.00427133
ILMN_1679809	GSTP1	11.2625	12.1181	-0.855625	0.00307207
ILMN_1746403	GTF2IRD2P	7.50687	7.89828	-0.391406	0.000464917
ILMN_1658464	GTF3A	12.3288	11.9472	0.381562	0.00490734
ILMN_2109489	GZMB	8.60938	7.765	0.844375	6.6638e-05
ILMN_1708728	H2AFJ	12.1512	11.3302	0.821094	0.00238125
ILMN_2373495	H2AFY	13.8256	13.445	0.380625	0.000373055
ILMN_1705570	H2AFY2	10.1863	11.0775	-0.89125	0.000618844
ILMN_1707858	H2AFZ	12.5881	12.0311	0.557031	0.00755861
ILMN_1721136	H6PD	7.63875	8.01203	-0.373281	0.000757773
ILMN_1772731	HAGH	11.7031	11.1947	0.508438	0.00208617
ILMN_1787256	HCN3	8.91062	8.47516	0.435469	0.00327612
ILMN_1727458	HDAC1	12.5013	12.1044	0.396875	0.00295419
ILMN_1791106	HEATR6	9.1075	8.54469	0.562813	0.00117507
ILMN_2202423	HELLS	8.1125	7.67062	0.441875	3.70343e-06
ILMN_1694268	HES6	9.4125	8.66359	0.748906	0.000153971
ILMN_1716195	HIST1H2BG	8.1625	7.70016	0.462344	0.00440569
ILMN_1703906	HJURP	8.69313	8.14297	0.550156	0.000508712
ILMN_1654268	HMGB2	9.83687	9.03766	0.799219	8.87357e-07
ILMN_1781942	HMMR	8.53063	7.96172	0.568906	4.03224e-05
ILMN_2409220	HMMR	8.33438	7.77828	0.556094	9.52973e-05
ILMN_1651262	HNRNPAB	13.6044	13.235	0.369375	0.00668305
ILMN_2166457	HPGD	7.19875	7.67922	-0.480469	0.00207199
ILMN_1773751	HRAS	9.59687	9.21344	0.383437	0.0042623
ILMN_1787843	HSDL2	9.23687	8.74125	0.495625	3.87323e-05
ILMN_1788017	HSH2D	8.705	8.08422	0.620781	0.00118526
ILMN_1679209	HSPA9	11.6094	11.2034	0.405937	0.00174856
ILMN_1721283	HSPB6	7.59688	7.99047	-0.393594	0.00469194
ILMN_1700419	HSPC171	9.95813	9.58297	0.375156	0.00114872
ILMN_2381397	HSPD1	12.7306	12.3009	0.429687	0.00194527
ILMN_1669927	ICOS	8.2275	7.84875	0.37875	0.00622947
ILMN_1664861	ID1	8.40437	8.84672	-0.442344	0.00437017
ILMN_1732296	ID3	9.115	9.74094	-0.625938	0.00507233
ILMN_1675939	IFNGR1	10.7269	11.153	-0.426094	0.0010809
ILMN_2132982	IGFBP5	13.24	12.1989	1.04109	0.00609464
ILMN_1669362	IGFBP6	8.8875	9.50453	-0.617031	0.000742944
ILMN_1774685	IL24	7.94	7.44109	0.498906	0.00161849
ILMN_1656310	INDO	7.88063	7.36062	0.52	0.000227127
ILMN_1685714	INHBB	8.18562	8.98672	-0.801094	3.85692e-05
ILMN_1686553	INTS2	8.38375	7.96141	0.422344	0.00032021
ILMN_1764861	ISOC1	9.46562	8.73406	0.731562	0.000882452
ILMN_1769158	ISOC2	9.07625	8.71625	0.36	0.00325025
ILMN_1668374	ITGB5	12.1819	12.7461	-0.564219	0.00459587
ILMN_1810214	JUND	14.8481	14.4669	0.38125	0.00333741
ILMN_1652065	KCNMB1	9.01	9.63	-0.62	0.00557605
ILMN_2146372	KCTD6	10.6288	9.75547	0.873281	0.000884249
ILMN_2285996	KIAA0101	10.3875	9.45063	0.936875	0.000209374
ILMN_1652246	KIAA0363	7.97938	8.45109	-0.471719	0.00836371
ILMN_1706960	KIAA1217	9.58125	9.95969	-0.378437	0.0057807
ILMN_1728885	KIAA1644	7.34813	7.80922	-0.461094	0.00707136
ILMN_1794539	KIF11	8.65	8.11234	0.537656	3.89421e-05
ILMN_1808071	KIF14	8.455	7.93672	0.518281	2.29031e-06
ILMN_1753063	KIF15	8.71187	7.96219	0.749687	1.03227e-07
ILMN_1695658	KIF20A	9.58313	8.83469	0.748437	2.62212e-05
ILMN_1811472	KIF23	8.07188	7.70813	0.36375	0.000982805
ILMN_1685916	KIF2C	8.80937	8.18094	0.628438	2.18454e-06
ILMN_1799667	KIF4A	8.12625	7.55156	0.574688	8.46396e-08
ILMN_2212999	KIF5C	9.04	9.76484	-0.724844	0.00563175
ILMN_2222008	KIFC1	9.89312	9.06813	0.825	0.000177243
ILMN_1659122	KLF10	7.16625	7.57734	-0.411094	0.00563081
ILMN_1679929	KLF13	9.10187	9.71219	-0.610313	0.00079855
ILMN_1748034	KLHDC4	9.51875	8.97437	0.544375	8.90246e-05
ILMN_1718731	KLK5	7.31562	7.76031	-0.444688	0.00950484
ILMN_1780255	KLK6	7.23813	7.84578	-0.607656	0.00204906
ILMN_1732516	KNTC1	10.38	9.56484	0.815156	1.28724e-05
ILMN_1708160	KPNA2	8.07437	7.68078	0.393594	0.00110746
ILMN_2163723	KRT7	9.7925	10.8784	-1.08594	0.00323153
ILMN_1788019	LAMA2	7.52563	8.025	-0.499375	0.00260577
ILMN_1715684	LAMB3	8.14687	8.87547	-0.728594	0.0018988
ILMN_1701424	LAMC2	8.0775	8.85672	-0.779219	0.00263269
ILMN_1657373	LEPREL1	8.64	9.18656	-0.546563	0.00775053
ILMN_1706779	LIG1	9.655	9.16563	0.489375	0.00107425
ILMN_2183687	LIME1	9.7925	9.32406	0.468437	0.00624964
ILMN_1748903	LIN28	7.59812	7.08109	0.517031	0.000139789
ILMN_2126706	LMNB1	8.05562	7.59891	0.456719	3.2159e-05
ILMN_1764323	LOC124512	10.6206	10.2683	0.352344	0.00232837
ILMN_2131293	LOC200810	8.55125	7.80844	0.742813	0.00163749
ILMN_2141118	LOC388135	7.69	8.15281	-0.462813	0.00940312
ILMN_1695946	LOC388610	8.00875	8.55437	-0.545625	0.000576707
ILMN_1706434	LOC440359	9.14438	9.63828	-0.493906	0.00580321
ILMN_1715476	LOC649970	10.0619	9.22531	0.836562	0.00928078
ILMN_1675852	LOC650518	12.1269	11.7256	0.40125	0.000355072
ILMN_1661255	LOC650526	7.99938	7.63219	0.367187	0.000957406
ILMN_1814812	LOC650546	7.9225	7.37344	0.549063	2.1439e-07
ILMN_1729115	LOC651816	10.1406	9.39516	0.745469	0.000380805
ILMN_1799098	LOC652846	6.9925	7.38766	-0.395156	0.00917251
ILMN_2064860	LOC653499	7.17	7.55156	-0.381563	0.000399334
ILMN_1691949	LOC728554	12.3819	11.9009	0.480938	0.00105921
ILMN_1808591	LOC731049	11.4394	10.5364	0.902969	2.75096e-05
ILMN_1785756	LOC731314	10.5156	9.91859	0.597031	0.000202658
ILMN_1796923	LOC81691	9.23687	8.80266	0.434219	0.000350372
ILMN_2179083	LOXL4	7.80313	8.29984	-0.496719	0.00285808
ILMN_1677765	LRP8	8.3025	7.83469	0.467812	9.18468e-05
ILMN_2406815	LRRC17	7.37437	7.94188	-0.5675	0.00703514
ILMN_1788099	LSM4	11.4869	10.8636	0.623281	0.000469688
ILMN_1805395	LTBP3	9.92188	10.5863	-0.664375	0.000453664
ILMN_1668247	LTC4S	7.5975	7.99734	-0.399844	0.000757252
ILMN_1714159	LUZP1	9.98188	10.4247	-0.442812	0.000282477
ILMN_1679391	MAMDC2	7.88625	8.49828	-0.612031	0.00297441
ILMN_2375002	MAP4K4	8.40937	8.82984	-0.420469	0.0030732
ILMN_2413898	MCM10	9.14625	8.26766	0.878594	6.39999e-08
ILMN_1681503	MCM2	10.2844	9.21109	1.07328	2.1147e-08
ILMN_2224143	MCM3	12.4075	12.0261	0.381406	0.00376319
ILMN_1737205	MCM4	10.62	10.0489	0.571094	0.000528849
ILMN_1815169	MCM5	9.6	9.17312	0.426875	0.00155115
ILMN_1798654	MCM6	11.4175	10.8592	0.558281	5.3152e-06
ILMN_1663195	MCM7	11.7538	11.3123	0.441406	0.000179958
ILMN_2205896	MEIS3P1	8.30125	8.80094	-0.499687	0.00271995
ILMN_1731184	MELK	8.85875	8.07078	0.787969	2.05706e-08
ILMN_2212909	MELK	9.70687	8.76781	0.939062	2.11771e-08
ILMN_1732089	MGC3207	10.4644	10.8788	-0.414375	0.00143041
ILMN_1663575	MGC87042	8.64312	9.43094	-0.787813	0.000927344
ILMN_2202915	MLSTD1	8.90688	8.19375	0.713125	0.00025296
ILMN_1774739	MMP14	7.71438	8.08891	-0.374531	0.00671592
ILMN_2148796	MND1	7.93937	7.56781	0.371562	0.000346072
ILMN_1712452	MPHOSPH1	9.6675	9.10672	0.560781	6.49167e-06
ILMN_1750689	MPP5	8.35125	8.76406	-0.412812	0.000487839
ILMN_1752932	MPZL2	9.40375	10.0233	-0.619531	0.00358039
ILMN_1719656	MRPL38	9.38063	8.90781	0.472813	0.00261878
ILMN_1722905	MRPS11	11.1125	10.7361	0.376406	0.00416304
ILMN_1676026	MRPS26	10.7338	10.1598	0.573906	0.0002913
ILMN_1729051	MSH6	10.96	10.5175	0.4425	5.55332e-05
ILMN_1804448	MSI2	9.13375	8.77203	0.361719	0.00611387
ILMN_1670723	MSL3L1	8.64687	8.28797	0.358906	7.60227e-05
ILMN_2228180	MSRA	8.58625	9.00734	-0.421094	0.000859778
ILMN_1676088	MSRB3	8.42687	9.06203	-0.635156	0.00163118
ILMN_1676159	MST4	9.62375	9.03297	0.590781	9.61189e-05
ILMN_1674706	MTHFD2	10.0856	9.43391	0.651719	2.40582e-05
ILMN_1772302	MTHFS	9.995	9.6125	0.3825	0.00212266
ILMN_1771019	MTMR4	10.3206	9.70766	0.612969	0.000328179
ILMN_2355665	MTP18	9.76188	9.30516	0.456719	0.00150622
ILMN_2346727	MTUS1	8.07125	8.49937	-0.428125	0.00523716
ILMN_1756541	MXD4	11.5969	12.1098	-0.512969	0.00100875
ILMN_1752075	MYBPC1	7.66	9.08984	-1.42984	0.00952659
ILMN_1660086	MYH11	10.0931	10.9794	-0.88625	0.00933985
ILMN_1681857	MYL7	7.14688	7.52172	-0.374844	0.00344295
ILMN_1691476	MYLK	8.365	9.05047	-0.685469	0.00420797
ILMN_1721167	MYT1	9.19688	8.16703	1.02984	0.00384646
ILMN_1804007	NANOS3	7.935	8.41344	-0.478437	0.00187271
ILMN_2181125	NAPB	10.2044	9.78469	0.419687	0.00432527
ILMN_1669142	NARG1	8.61063	8.24125	0.369375	1.44086e-05
ILMN_1751444	NCAPG	9.31	8.33859	0.971406	3.14652e-07
ILMN_1777528	NCBP1	9.415	9.00797	0.407031	0.00111234
ILMN_1708805	NCOA3	10.4394	10.0661	0.373281	0.00683522
ILMN_1664511	NDC80	8.06187	7.62719	0.434688	2.3413e-05
ILMN_2051373	NEK2	9.4275	8.33188	1.09563	2.01884e-07
ILMN_1692280	NKX2-2	7.925	7.28547	0.639531	0.00371071
ILMN_1723768	NLRX1	8.81813	9.19437	-0.37625	0.000861594
ILMN_2414399	NME1	8.87	8.39031	0.479687	0.000104005
ILMN_1741133	NME1	12.9813	12.3936	0.587656	0.000254001
ILMN_1688971	NOL11	10.5525	9.97781	0.574688	1.83322e-06
ILMN_2044832	NOL5A	10.57	10.0928	0.477187	0.00556383
ILMN_2135798	NR2C2AP	9.44187	8.95844	0.483437	0.000212723
ILMN_1672080	NR2F6	10.8806	10.3925	0.488125	0.000818077
ILMN_1809364	NTF3	7.30687	7.69766	-0.390781	0.00942611
ILMN_2113490	NTN4	8.94688	9.71812	-0.77125	0.00503577
ILMN_2330243	NUDT1	10.4437	9.9275	0.51625	0.00209482
ILMN_1673962	NUP205	10.4844	10.1289	0.355469	7.15438e-05
ILMN_1784467	NUP210	9.10938	8.63766	0.471719	0.000381801
ILMN_1726720	NUSAP1	10.6237	9.68203	0.941719	1.84775e-05
ILMN_1697639	OGT	11.8387	11.4306	0.408125	0.00744083
ILMN_2196984	OIP5	9.01062	8.44969	0.560937	0.000246819
ILMN_1727532	OLFML3	8.86813	9.3575	-0.489375	0.00830554
ILMN_1749846	OMD	7.74125	8.55406	-0.812813	0.0005797
ILMN_1907095	ONECUT2	7.62313	7.22953	0.393594	1.18246e-05
ILMN_1802023	OR7E156P	7.35313	7.70734	-0.354219	9.52353e-05
ILMN_2205999	OSMR	7.34125	7.72984	-0.388594	0.000819596
ILMN_1786429	P2RY5	9.19062	9.54859	-0.357969	0.00175366
ILMN_1728984	PA2G4	10.8031	10.3862	0.416875	0.00906154
ILMN_1698732	PALLD	10.8825	11.5269	-0.644375	0.00441227
ILMN_2313901	PAM	11.5838	12.1333	-0.549531	0.00844981
ILMN_1710571	PAPD5	9.48563	8.85	0.635625	0.000370797
ILMN_1673673	PBK	8.31813	7.86375	0.454375	0.00285261
ILMN_1671791	PCK2	10.6031	10.0491	0.554062	2.41846e-05
ILMN_1694177	PCNA	9.86125	9.27766	0.583594	0.00819094
ILMN_2081813	PCSK1	7.49062	7.05234	0.438281	0.00849229
ILMN_1679725	PCYOX1	8.84625	9.40344	-0.557187	0.00946835
ILMN_2301722	PDE8B	8.4275	9.16641	-0.738906	0.00579065
ILMN_1680339	PDGFRL	9.45562	10.4402	-0.984531	0.000497788
ILMN_1772369	PDHA1	9.85375	9.44219	0.411562	0.00723376
ILMN_1788955	PDLIM1	9.66125	10.4261	-0.764844	0.00161054
ILMN_1695299	PDLIM3	8.135	8.77203	-0.637031	0.00394076
ILMN_1672504	PDXK	10.6375	11.2061	-0.568594	0.000467211
ILMN_1780132	PELI2	7.7325	8.14062	-0.408125	0.00169965
ILMN_1716265	PGM2L1	8.06375	8.52531	-0.461562	0.00169435
ILMN_2271149	PGM5	7.35063	7.75641	-0.405781	0.00710503
ILMN_1687978	PHLDA1	8.79375	9.38156	-0.587812	0.00764301
ILMN_1666819	PHLDB1	10.3944	10.8606	-0.46625	0.00964342
ILMN_1694799	PIAS2	9.44562	8.90797	0.537656	0.00163371
ILMN_2155272	PIF1	7.90875	7.54625	0.3625	0.000127939
ILMN_1776375	PIN1	11.7006	11.342	0.358594	0.00148405
ILMN_2092077	PIP	10.3738	12.3708	-1.99703	0.00155962
ILMN_1761247	PIR	8.35313	7.88078	0.472344	0.00115732
ILMN_1670638	PITPNC1	9.01813	8.50625	0.511875	0.000440174
ILMN_1653220	PITPNM1	9.12312	9.54672	-0.423594	0.0080221
ILMN_1674386	PITX1	11.5394	10.0939	1.44547	0.000471155
ILMN_2401436	PKMYT1	8.0375	7.485	0.5525	9.46282e-07
ILMN_2408543	PLAUR	7.35125	7.79	-0.43875	0.00769261
ILMN_1747451	PLCXD1	9.22938	8.80141	0.427969	0.00428435
ILMN_1789123	PLK4	8.985	8.42812	0.556875	9.74627e-06
ILMN_1785265	PLS3	8.29063	9.00547	-0.714844	0.00874564
ILMN_1703433	PLSCR3	11.2044	11.7355	-0.531094	3.28077e-05
ILMN_1757338	PLSCR4	8.5525	9.07516	-0.522656	0.00302817
ILMN_2309156	PMEPA1	9.3875	10.2048	-0.817344	0.000257702
ILMN_1785646	PMP22	11.6819	12.2327	-0.550781	0.00848539
ILMN_2191436	POLA1	8.92625	8.52266	0.403594	3.95234e-05
ILMN_1696713	POLA2	9.79125	9.26766	0.523594	4.35781e-05
ILMN_1774336	POLE2	8.535	8.18422	0.350781	0.00181964
ILMN_1740291	POLQ	9.21125	8.38937	0.821875	2.97201e-07
ILMN_1714158	PON2	10.175	10.6777	-0.502656	0.0025813
ILMN_1689177	PPAPDC1A	7.095	7.52016	-0.425156	0.00659449
ILMN_1667791	PPFIA4	8.7525	7.89922	0.853281	0.000164958
ILMN_1679460	PPFIBP1	8.3775	8.81703	-0.439531	0.000192703
ILMN_1715616	PPIL5	9.23125	8.82281	0.408437	2.0001e-05
ILMN_1670875	PPM1D	8.38188	7.955	0.426875	0.00694166
ILMN_1708508	PPM1E	8.44438	7.74047	0.703906	1.4293e-05
ILMN_1712659	PPP2CB	9.40312	9.95469	-0.551562	0.00325629
ILMN_1700031	PRAME	8.25375	7.67891	0.574844	0.00631772
ILMN_1728934	PRC1	11.1306	9.91312	1.2175	9.50558e-08
ILMN_2366388	PRDX1	13.7106	13.2956	0.415	0.0016923
ILMN_1803180	PRDX6	12.7531	12.3147	0.438438	7.7383e-05
ILMN_1793476	PRKCDBP	9.97625	10.513	-0.536719	0.0098618
ILMN_1675038	PRMT2	9.52313	9.88953	-0.366406	0.00218785
ILMN_1715392	PRPF3	10.7219	10.2594	0.4625	0.00308281
ILMN_2160727	PSCD3	7.71562	8.13969	-0.424062	0.000791536
ILMN_1780189	PSMC5	10.9906	10.5961	0.394531	0.00871456
ILMN_2368971	PSMD12	9.9125	9.53688	0.375625	0.00244496
ILMN_1671843	PSRC1	8.80938	8.35937	0.45	1.51688e-05
ILMN_1677384	PTGER3	7.53937	8.01281	-0.473437	0.0044705
ILMN_1714364	PTK2	12.5106	12.1327	0.377969	0.00110064
ILMN_1681591	PTPN1	11.4444	10.8202	0.624219	0.00684038
ILMN_2411794	PTPRA	10.3463	9.93672	0.409531	0.00746574
ILMN_1734543	PTPRE	8.65063	9.04859	-0.397969	0.00081947
ILMN_1744937	PTPRM	9.06	9.43906	-0.379062	0.00805104
ILMN_1683052	PTRH2	8.195	7.57437	0.620625	4.77995e-08
ILMN_2311548	PTRH2	10.9744	10.1103	0.864063	6.12203e-07
ILMN_2042771	PTTG1	10.8319	9.73406	1.09781	1.10419e-08
ILMN_1802251	PTTG1IP	10.525	11.0659	-0.540938	0.00194478
ILMN_2049021	PTTG3	9.47812	8.61547	0.862656	4.91857e-10
ILMN_1790317	RAB26	9.98563	9.31969	0.665938	0.00273415
ILMN_2077550	RACGAP1	9.36875	8.74187	0.626875	3.18399e-06
ILMN_2221006	RAD21	10.1537	9.31187	0.841875	0.00116974
ILMN_1670353	RAD51AP1	8.75938	8.26484	0.494531	0.000571198
ILMN_1695386	RAD51C	9.76125	9.12234	0.638906	1.23221e-05
ILMN_1658027	RAD54L	7.93625	7.50641	0.429844	7.71862e-06
ILMN_1781454	RAE1	10.98	10.5392	0.440781	0.000812382
ILMN_1773561	RAP2C	9.11	8.64859	0.461406	0.00261361
ILMN_1675979	RBMS3	7.23	7.64672	-0.416719	0.00230972
ILMN_2323087	RBPMS	8.18125	8.67437	-0.493125	0.00209624
ILMN_1712112	RCAN1	7.30125	7.93547	-0.634219	0.0074936
ILMN_1810000	RDH16	8.16	7.66266	0.497344	0.000788897
ILMN_1703092	RECQL4	8.88125	8.18	0.70125	0.000904444
ILMN_1724489	RFC4	9.39438	8.95859	0.435781	0.00014558
ILMN_1659364	RFC5	9.65312	9.20375	0.449375	2.05126e-05
ILMN_1810559	RHOQ	11.2588	11.7539	-0.495156	0.00172247
ILMN_1665257	RIMS2	7.79188	7.29781	0.494063	0.00093778
ILMN_1742382	RIMS3	8.05625	8.42953	-0.373281	0.00844029
ILMN_2151488	RMI1	9.40312	9.02687	0.37625	0.00533603
ILMN_1694533	RMND1	8.63312	8.05734	0.575781	0.0040911
ILMN_1810901	RNASEH2A	8.86563	8.49516	0.370469	0.00240695
ILMN_1730223	RNF39	7.99	8.47812	-0.488125	0.00739092
ILMN_2375599	RNH1	9.71937	10.1305	-0.411094	0.00644471
ILMN_1808245	RPESP	8.24563	10.095	-1.84938	1.20047e-05
ILMN_1693421	RPN2	9.88063	9.42531	0.455312	0.00830933
ILMN_1695271	RPP25	8.41688	8.04641	0.370469	0.00650717
ILMN_1702501	RPS6KA2	9.60375	9.99062	-0.386875	0.00676918
ILMN_1704557	RPS6KB1	11.4125	10.4442	0.968281	8.29068e-08
ILMN_1735658	RTTN	9.71625	9.31328	0.402969	0.00107344
ILMN_2046730	S100A10	12.5275	13.1038	-0.57625	0.00474896
ILMN_1688780	S100A4	10.3881	11.0541	-0.665938	0.00626547
ILMN_1673191	S100A7A	8.07188	7.45516	0.616719	0.00486837
ILMN_1776674	SAC3D1	10.4094	9.78719	0.622188	0.000829857
ILMN_2199022	SAP30BP	8.70687	8.34359	0.363281	0.00565177
ILMN_1753345	SCAMP5	8.8575	8.42328	0.434219	0.00615258
ILMN_1723358	SCARA3	8.0975	8.65547	-0.557969	0.00106509
ILMN_1689329	SCD	13.2669	12.2905	0.976406	0.000705651
ILMN_1679666	SCGB3A1	7.5225	8.94828	-1.42578	0.00353077
ILMN_2323366	SDHC	9.86	9.35641	0.503594	6.66836e-05
ILMN_1779381	SEC61A2	8.33875	7.95656	0.382187	0.000245899
ILMN_1724422	SELL	8.23625	7.78953	0.446719	0.00867197
ILMN_1651429	SELM	10.41	10.847	-0.437031	0.00560421
ILMN_1741585	SFMBT1	9.03375	8.68031	0.353438	0.00734748
ILMN_1696407	SFRS2	12.7575	12.3753	0.382187	0.000850339
ILMN_1746699	SGOL2	8.56438	8.14969	0.414687	0.000597786
ILMN_1653133	SH3D19	8.815	9.35078	-0.535781	0.000455495
ILMN_1661137	SH3RF2	7.55938	7.91344	-0.354062	0.00991274
ILMN_1661264	SHMT2	11.7581	11.3637	0.394375	0.00185561
ILMN_1812702	SIX1	7.94562	7.50438	0.44125	0.00648173
ILMN_1793672	SIX5	10.115	10.5422	-0.427188	0.00722371
ILMN_1804673	SLC16A4	7.76063	8.17672	-0.416094	0.000661996
ILMN_1755649	SLC16A5	8.78062	9.27438	-0.49375	0.00108004
ILMN_1656904	SLC1A4	9.26813	8.86625	0.401875	0.00643854
ILMN_1707720	SLC1A5	9.75	9.27109	0.478906	0.00458883
ILMN_1740430	SLC2A4RG	9.03187	8.57391	0.457969	4.03411e-05
ILMN_1727840	SLC35B1	11.4075	10.9634	0.444062	0.00424622
ILMN_1759743	SLC38A10	9.00438	8.62312	0.38125	0.00735773
ILMN_1695316	SLC39A8	8.78375	8.14766	0.636094	0.00173303
ILMN_1681526	SLC5A1	7.46188	7.97938	-0.5175	0.00756016
ILMN_2411190	SMC2	9.25687	8.79031	0.466562	7.40368e-05
ILMN_2330861	SMC4	10.3788	9.7575	0.62125	7.32614e-06
ILMN_1706553	SMG7	11.1931	10.6777	0.515469	0.00173663
ILMN_1782098	SMO	7.79125	8.15062	-0.359375	0.00124483
ILMN_2225318	SMS	10.7756	10.2598	0.515781	0.00938342
ILMN_1707493	SNHG3-RCC1	9.44313	9.07937	0.36375	0.00321507
ILMN_1715179	SNRPA1	11.4906	11.0913	0.399375	1.19628e-05
ILMN_1774661	SNRPB	11.4113	10.8683	0.542969	3.70232e-06
ILMN_1799103	SNRPB	12.2075	11.7745	0.432969	0.00145328
ILMN_2086064	SNRPC	10.4594	10.0317	0.427656	1.95827e-05
ILMN_1662438	SOD1	13.1319	12.7548	0.377031	0.0043707
ILMN_1749792	SORBS1	8.27625	8.76187	-0.485625	0.000681326
ILMN_1778599	SP140	8.18187	7.82203	0.359844	0.00297038
ILMN_1796734	SPARC	11.4788	12.2423	-0.763594	0.00218052
ILMN_1684563	SPIN4	9.04438	8.51578	0.528594	0.000116406
ILMN_1681263	SPINK4	7.61875	7.20062	0.418125	0.00611393
ILMN_2374449	SPP1	8.36813	9.45063	-1.0825	0.00815164
ILMN_2041293	SQLE	10.6825	10.1089	0.573594	0.00671431
ILMN_1682054	SRI	7.62625	8.08312	-0.456875	0.00902172
ILMN_1676625	SS18L1	9.25687	8.88484	0.372031	0.00486087
ILMN_2350183	ST5	8.29563	8.76422	-0.468594	0.00479423
ILMN_1717052	STARD10	12.8287	11.9064	0.922344	0.00120018
ILMN_2401978	STAT3	10.7156	11.3492	-0.633594	0.000100654
ILMN_1663618	STAT3	9.15875	9.65391	-0.495156	0.0012858
ILMN_2410986	STAT3	8.72	9.35828	-0.638281	0.00187246
ILMN_1769720	STAU2	9.41937	9.01688	0.4025	0.00390391
ILMN_1733094	STEAP1	7.7525	8.46375	-0.71125	0.000783344
ILMN_2344298	STEAP2	8.16437	8.99391	-0.829531	5.65628e-05
ILMN_1809101	STEAP2	8.0625	8.89656	-0.834062	0.000132472
ILMN_2413650	STIL	9.74312	9.13875	0.604375	5.43625e-06
ILMN_1789510	STIP1	11.305	10.8311	0.473906	0.00622461
ILMN_1657796	STMN1	10.0606	9.34953	0.711094	1.7216e-05
ILMN_1769634	STRA13	11.72	11.2908	0.429219	0.00785439
ILMN_1808783	STRBP	9.60125	9.21672	0.384531	0.00281722
ILMN_1781479	SUV39H1	9.8575	9.43125	0.42625	0.000279845
ILMN_1724407	TACC3	8.45438	7.9175	0.536875	4.21835e-05
ILMN_2400935	TAGLN	9.44813	10.3189	-0.870781	0.000535112
ILMN_1685480	TARS	9.76375	9.37266	0.391094	0.00782952
ILMN_1803392	TAX1BP3	10.0225	10.5444	-0.521875	0.00119672
ILMN_2066020	TCEB1	11.0062	10.5437	0.4625	0.003204
ILMN_1685490	TEX14	7.83	7.34484	0.485156	0.00579228
ILMN_2374115	TFAP2A	9.415	9.84484	-0.429844	0.0048351
ILMN_1687652	TGFB3	10.1638	10.762	-0.598281	0.0045941
ILMN_1663954	TH1L	11.3219	10.8363	0.485625	0.000619186
ILMN_2415926	THOC3	9.85312	9.43469	0.418437	0.00603524
ILMN_1735093	TIMELESS	10.2894	9.45438	0.835	1.53549e-08
ILMN_1721876	TIMP2	11.5431	12.2241	-0.680937	0.00706024
ILMN_1806037	TK1	10.05	9.38859	0.661406	0.0013329
ILMN_1663486	TLK2	9.43188	9.03406	0.397813	0.00120782
ILMN_1692511	TMEM106C	11.1131	10.4056	0.7075	0.000316573
ILMN_1738093	TMEM118	9.44062	8.87625	0.564375	0.00048466
ILMN_1683470	TMEM139	7.29625	7.77688	-0.480625	0.00471515
ILMN_1752589	TMEM183A	11.7475	11.3919	0.355625	0.00327845
ILMN_2172269	TMEM183B	11.7525	11.367	0.385469	0.00159507
ILMN_2162989	TMEM189	10.0512	9.58641	0.464844	0.00882258
ILMN_2131336	TMEM194	8.82687	8.36172	0.465156	0.000785585
ILMN_1784661	TMEM2	9.21937	9.67641	-0.457031	0.00253856
ILMN_1692754	TMEM49	12.855	12.0595	0.795469	3.95892e-06
ILMN_1710962	TMEM97	10.7169	10.1105	0.606406	0.000314056
ILMN_1791123	TMPRSS2	7.82625	8.48672	-0.660469	0.00332605
ILMN_1699265	TNFRSF10B	9.00563	9.41125	-0.405625	0.00514067
ILMN_1704154	TNFRSF19	9.28625	10.1289	-0.842656	0.000946592
ILMN_1690826	TNKS1BP1	9.63625	10.0286	-0.392344	0.00880261
ILMN_1667893	TNS3	11.225	11.642	-0.417031	0.0043579
ILMN_1686097	TOP2A	10.55	9.70453	0.845469	0.0022127
ILMN_1684929	TOPBP1	9.23312	8.82203	0.411094	0.00398353
ILMN_1716687	TPM1	9.93625	10.733	-0.796719	0.000749785
ILMN_1796949	TPX2	8.755	8.01109	0.743906	6.92159e-06
ILMN_1747058	TRAPPC2L	11.5456	11.078	0.467656	0.0059783
ILMN_1787815	TRIB3	9.97938	9.46422	0.515156	0.00152632
ILMN_1704972	TRIM5	7.95687	8.52828	-0.571406	0.000792243
ILMN_1656910	TRIM6	8.40125	8.86766	-0.466406	0.00131463
ILMN_1796589	TRIP13	9.50812	8.73813	0.77	2.49739e-05
ILMN_1713990	TRIP6	10.0369	10.6594	-0.6225	0.000370842
ILMN_1809944	TRMT12	9.60813	9.25469	0.353438	0.00840992
ILMN_1700337	TROAP	9.24625	8.38219	0.864062	4.58655e-06
ILMN_1748124	TSC22D3	11.1463	10.5155	0.630781	0.000601497
ILMN_1657509	TSEN54	9.14125	8.71984	0.421406	0.00624263
ILMN_2340027	TSPAN4	8.7875	9.30344	-0.515937	0.00253169
ILMN_1729453	TSPAN9	11.95	12.4703	-0.520312	1.48195e-05
ILMN_2260991	TSPO	9.22375	9.84812	-0.624375	0.00702594
ILMN_1788166	TTK	8.8725	8.21766	0.654844	1.28874e-06
ILMN_2148819	TUBA1A	13.4056	13.0503	0.355312	0.0053423
ILMN_1800261	TUBA1B	14.2662	13.7898	0.476406	8.67722e-05
ILMN_1699489	TUBB6	8.405	8.84484	-0.439844	0.00587211
ILMN_1806040	TYMS	9.62313	8.95219	0.670938	0.00106818
ILMN_1714730	UBE2C	10.8681	9.45969	1.40844	1.00003e-08
ILMN_2301083	UBE2C	11.2088	9.75516	1.45359	3.43897e-08
ILMN_2390338	UBE2E3	8.7775	9.50906	-0.731562	0.00283025
ILMN_1711470	UBE2T	9.31563	8.52969	0.785937	2.10415e-07
ILMN_1794914	UBTD1	8.995	9.41047	-0.415469	0.00167837
ILMN_1692861	UGT2A3	7.69312	7.17469	0.518437	0.00126066
ILMN_2206500	UGT2B4	7.7475	7.29172	0.455781	0.00222833
ILMN_1786065	UHRF1	10.5756	9.77516	0.800469	5.50378e-05
ILMN_1691188	UIMC1	10.8588	10.5	0.35875	0.00255454
ILMN_1804743	USP32	8.75813	7.94937	0.80875	0.000119522
ILMN_1704876	USP38	10.2662	9.83953	0.426719	0.000157325
ILMN_2413527	VCL	7.61812	8.09469	-0.476562	0.00198046
ILMN_2166716	VCX-C	7.64875	7.2575	0.39125	0.00066268
ILMN_1757497	VGF	8.38563	7.5425	0.843125	0.000403815
ILMN_1768480	VGLL4	11.2813	11.6672	-0.385937	0.00654591
ILMN_2337655	WARS	10.8425	10.4267	0.415781	0.00177721
ILMN_1679838	WBP5	10.5094	11.0998	-0.590469	0.00755045
ILMN_1685928	WDR34	9.96125	9.36641	0.594844	7.98825e-06
ILMN_1780667	WDR51A	9.73687	9.09906	0.637812	8.37896e-06
ILMN_1682264	WDR68	11.1388	10.6591	0.479688	0.00157643
ILMN_1800317	WNT5A	7.5975	8.31625	-0.71875	0.0026107
ILMN_1772824	WNT5B	7.89937	8.25062	-0.35125	0.00258869
ILMN_1759495	XPO5	9.12562	8.72906	0.396562	0.000310206
ILMN_1753885	YTHDF1	10.8481	10.4947	0.353438	0.00146411
ILMN_2150258	ZFP36L2	7.78188	8.46594	-0.684063	0.00463774
ILMN_1696339	ZIC2	7.87625	7.40375	0.4725	0.000520322
ILMN_1654262	ZMAT3	8.6825	9.41984	-0.737344	0.00171959
ILMN_1798533	ZNF22	9.69813	10.1416	-0.443438	0.000879134
ILMN_1772876	ZNF395	10.015	10.4794	-0.464375	0.0056704
ILMN_2154950	ZNF423	7.88375	8.33469	-0.450938	0.00184687
ILMN_1657087	ZNF533	7.5575	8.33766	-0.780156	0.00958962
ILMN_1807234	ZNF700	8.65188	8.24281	0.409063	8.37396e-05
ILMN_1782021	ZNF707	8.79062	8.33797	0.452656	0.00287275
ILMN_1761490	ZNF75	8.86937	8.51	0.359375	0.00394936
ILMN_2093775	ZNF831	7.83688	7.46734	0.369531	0.000914926
ILMN_1654946	ZSCAN18	10.4388	11.205	-0.76625	0.00446851
ILMN_2362549	ZWINT	8.91875	8.32547	0.593281	3.34207e-05

## Sheet: Sheet1
BRC002
BRC004
BRC005
BRC007
BRC009
BRC011
BRC012
BRC024
BRC026
BRC027
BRC028
BRC030
BRC033
BRC034
BRC035
BRC043
BRC045
BRC046
BRC047
BRC048
BRC051
BRC052
BRC056
BRC065
BRC069
BRC070
BRC071
BRC072
BRC073
BRC074
BRC079
BRC080
BRC082
BRC086
BRC089
BRC090
BRC091
BRC095
BRC096
BRC098
BRC099
BRC100
BRC101
BRC102
BRC105
BRC109
BRC113
BRC114
BRC115
BRC117
BRC123
BRC125
BRC127
BRC130
BRC132
BRC135
BRC136
BRC138
BRC140
BRC146
BRC151
BRC160
BRC161
BRC167
BRC168
BRC169
BRC170
BRC179
BRC186
BRC188
BRC189
BRC190
BRC192
BRC194
BRC195
BRC197
BRC199
BRC201
BRC202
BRC204
BRC205
BRC209
BRC210
BRC211
BRC220
BRC224
BRC226
BRC227
BRC228
BRC229
BRC232E
BRC237
BRC242
BRC244
BRC247
BRC249
BRC250
BRC253
BRC254
BRC259
BRC262
BRC264
BRC268
BRC270
BRC271
BRC275
BRC276
BRC280
BRC281
BRC283
BRC288
BRC291
BRC292
BRC293
BRC294
BRC296
BRC300
BRC303
BRC305
BRC306
BRC307
BRC308
BRC312
BRC318
BRC321
BRC323
BRC328
BRC329
BRC330
BRC332
BRC334
BRC336
BRC338
BRC339
BRC340
BRC341
BRC343
BRC344
BRC346
BRC347
BRC348
BRC350
BRC351
BRC355
BRC356
BRC358
BRC360
BRC361
BRC362
BRC363
BRC365
BRC370
BRC372
BRC373
BRC376
BRC378
BRC382
BRC383
BRC384
BRC398
BRC408
BRC412
BRC413
BRC415
BRC416
BRC417
BRC418
BRC421
BRC422
BRC424
BRC425
BRC428
BRC430
BRC432
BRC433
BRC436
BRC441
BRC449P
BRC453N
BRC454P
BRC458
BRC461
