# Supplementary material for: Prognostic Discrimination Using a 70-Gene Signature among Patients with Estrogen Receptor-Positive Breast Cancer and an Intermediate 21-Gene Recurrence Score
Source: Int J Mol Sci. 2013 Dec 4;14(12):23685–99. doi: 10.3390/ijms141223685 (PMC3876071; doi:10.3390/ijms141223685)
Supplement: Supplementary file 1 [file ijms-14-23685-s001.pdf]

# Supplementary Information

**Table S1.** Univariate analysis using the log-rank test according to the characteristics.

|                                   | <i>p</i> -value |
|-----------------------------------|-----------------|
| <b>Tumor size</b>                 | 0.758           |
| $T \leq 2$ cm vs. $T > 2$ cm      |                 |
| <b>Nodal status</b>               | 0.825           |
| Negative vs. Positive             |                 |
| <b>Stage</b>                      | 0.371           |
| I vs. II vs. III                  |                 |
| <b>Histologic grade</b>           | 0.442           |
| I-II vs. III                      |                 |
| <b>Progesterone receptor</b>      | 0.754           |
| Positive vs. Negative             |                 |
| <b>HER-2 *</b>                    | 0.756           |
| Negative vs. Positive             |                 |
| <b>70GS</b>                       | 0.013           |
| Good vs. Poor                     |                 |
| <b>Adjuvant chemotherapy</b>      | 0.024           |
| Yes or No                         |                 |
| <b>Adjuvant endocrine therapy</b> | 0.811           |
| Yes or No                         |                 |
| <b>Adjuvant radiotherapy</b>      | 0.085           |
| Yes or No                         |                 |

HER-2, human epidermal growth factor receptor-2; \* HER2 positivity was defined by three positive findings in an immunohistochemical examination or amplification in fluorescence *in situ* hybridization.

© 2013 by the authors; licensee MDPI, Basel, Switzerland. This article is an open access article distributed under the terms and conditions of the Creative Commons Attribution license (<http://creativecommons.org/licenses/by/3.0/>).
